# Supplementary material for: Gut metagenomic analysis reveals prominent roles of Lactobacillus and cecal microbiota in chicken feed efficiency
Source: PubMed Central journal article supplement (PMC7365323; doi:10.1038/srep45308), 2017-03-28
Supplement: 41598_2017_BFsrep45308_MOESM70_ESM.pdf [file 41598_2017_BFsrep45308_MOESM70_ESM.pdf]

1 **Gut metagenomic analysis reveals prominent roles of *Lactobacillus* and cecal**  
2 **microbiota in chicken feed efficiency**

3 Wei Yan<sup>1</sup>, Congjiao Sun<sup>1</sup>, Jingwei Yuan<sup>1</sup>, and Ning Yang<sup>1,\*</sup>

4

5 <sup>1</sup> National Engineering Laboratory for Animal Breeding and MOA Key Laboratory of  
6 Animal Genetics and Breeding, College of Animal Science and Technology, China  
7 Agricultural University, Beijing, 100193, China

8

9 \* Corresponding author: Ning Yang

10 \* Corresponding E-mail: [nyang@cau.edu.cn](mailto:nyang@cau.edu.cn)

11

12 **Abstract**

13 Interactions between the host and gut microbiota can affect gut metabolism. In this  
14 study, the individual performances of 252 hens were recorded to evaluate feed  
15 efficiency. Hens with contrasting feed efficiencies (14 birds per group) were selected  
16 to investigate their duodenal, cecal and fecal microbial composition by sequencing the  
17 16S rRNA gene V4 region. The results showed that the microbial community in the  
18 cecum was quite different from those in the duodenum and feces. The highest  
19 biodiversity and all differentially abundant taxa between the different efficiency  
20 groups were observed in the cecal microbial community with false discovery rate  
21 (FDR) <0.05. Of these differentially abundant cecal microbes, *Lactobacillus*  
22 accounted for a greater proportion than the others. The abundances of *Lactobacillus*  
23 and *Akkermansia* were significantly higher while that of *Faecalibacterium* was lower  
24 (FDR<0.05) in the better feed efficiency (BFE) group. Phylogenetic investigation of  
25 communities by reconstruction of unobserved states (PICRUSt) analysis revealed that  
26 the functions relating to glycometabolism and amino acid metabolism were enriched  
27 in the cecal microbiota of the BFE group. These results indicated the prominent role  
28 of cecal microbiota in the feed efficiency of chickens and suggested plausible uses of  
29 *Lactobacillus* to improve the feed efficiency of host.

30

31 **Introduction**

32 The gastrointestinal tract is the major site of food digestion and nutrient absorption.  
33 Cecum is the chief functional section in the distal intestine, and its importance in birds'  
34 metabolism has received increasing attention<sup>1,2</sup>. The cecum, which is full of microbial  
35 fermentations, plays important roles in preventing pathogen colonization, detoxifying  
36 harmful substances, recycling nitrogen and absorbing additional nutrients<sup>3</sup>. The  
37 digestibility and the ability to metabolize crude fiber or other nutrients are lower in  
38 birds with a cecectomy than in normal birds<sup>4</sup>. In addition, significant absorption of  
39 glucose was observed in the cecum<sup>5</sup>, and a higher ability to actively absorb sugars at  
40 low concentrations was found in the cecum compared with the jejunum<sup>6</sup>. Located at  
41 the beginning of the intestine, the duodenum is crucial for feed digestion and  
42 absorption; it has a lower pH than the hindgut and is the region that absorbs most  
43 glucose<sup>7</sup> and other nutrients within the small intestine<sup>8,9</sup>.

44 Although the cecum and the duodenum themselves are important, interactions  
45 between the gut and commensal microbes may exert a significant influence on the  
46 function of the intestine. Previous studies showed that the digestion of uric acid,  
47 cellulose, starch and other resistant carbohydrates in the cecum was associated with  
48 the cecal microbial members<sup>3,10,11</sup>. In a recent study, numerous oligosaccharide- and  
49 polysaccharide-degrading enzyme-encoding genes and several pathways involved in  
50 the production of short-chain fatty acids (SCFAs) were observed in the cecal  
51 metagenome of the chicken<sup>12</sup>. The SCFAs were produced mainly by microbial  
52 fermentation in the hindgut and could be absorbed through the mucosa and

53 catabolized for energy by the host<sup>13</sup>; the SCFAs also inhibited acid-sensitive  
54 pathogens by lowering the pH<sup>14</sup>. Due to the rapid flow of the highly fluid, digested  
55 material and a higher acidity, the number of microbes in the duodenum was lower  
56 than that in the posterior intestine. *Lactobacilli* and *Lactobacillaceae* were observed  
57 to be the predominant microbes in the duodenum of chickens<sup>15</sup> and mice<sup>16</sup>,  
58 respectively. However, the relationship between the duodenal microbiota and the host  
59 nutritional metabolism is poorly understood. Feces have been widely used for  
60 metagenomic studies, because their easy to collection, allowing a continuous  
61 observation of the changes during a period without complicated operations or  
62 sacrifices, however, the microbial relationships between feces and intestinal segments  
63 in layer chickens are still unclear and need to be explored<sup>15-17</sup>.

64 For farm animals, great attention is paid to feed efficiency which is a  
65 comprehensive trait to evaluate the efficacy of nutrient and energy metabolism.  
66 Improving feed efficiency can decrease the cost to producers, preserve additional  
67 edible resources for humans, and reduce the excrement effluent and the emission of  
68 greenhouse gases. The feed conversion ratio (FCR) and residual feed intake (RFI) are  
69 the major indices for assessing the feed efficiency of animals. FCR has been used in  
70 breeding for a long time because of its convenience and effect on improving growth.  
71 However, in contrast to RFI, FCR does not include variability in the maintenance  
72 requirement for feed intake<sup>18</sup> and does not distribute normally<sup>19</sup>. Koch *et al.*<sup>20</sup>  
73 proposed the concept of RFI, which accounts for both maintenance requirements and  
74 growth. Because of its phenotypic independence from maintaining body weight and

75 body weight gain, RFI has been proposed for measuring feed efficiency in breeding,  
76 with the heritability of RFI in chickens ranging from 0.2 to 0.8<sup>21-24</sup>. Feed efficiency is  
77 a complex trait because it is influenced not only by the host genetics and  
78 physiological state but also by the intestinal microbiota, which would affect the  
79 nutrient digestion and energy absorption of the host. Singh *et al.*<sup>25</sup> investigated the  
80 difference in microbial communities between good and poor feed efficiency broilers  
81 using fecal samples; *Acinetobacter*, *Anaerosporobacter* and *Arcobacter* were  
82 dominant in the poor efficiency group, whereas *Escherichia/Shigella*,  
83 *Faecalibacterium* and *Helicobacter* were dominant in the better efficiency group.  
84 However, the abundances of *Lactobacillus* and *Bacteroides* were similar in both  
85 groups. Mignon-Grasteau *et al.*<sup>26</sup> quantified the microbial 16S rDNA in the cecum by  
86 qPCR and observed higher ratios of *Clostridium leptum*, *Clostridium coccoides* and  
87 *Lactobacillus salivarius* to *E. coli* in the better efficiency group. Nevertheless, the  
88 feed efficiency in both studies was represented by FCR, and the relationships between  
89 RFI and the gut microbiota remain to be understood.

90 Next-generation sequencing techniques have been used to study microbiota  
91 composition and extend the understanding of the interactions between the host and  
92 commensal microbes in feed efficiency studies. However, the microbial communities  
93 have not been compared among the foregut (duodenum), hindgut (cecum) and feces in  
94 hens, and the interactions between the feed efficiency evaluated using RFI and gut  
95 microbiota need to be explored.

96 **Results**

97 **Phenotypic and sequencing data.** The daily feed intake (FI), daily egg mass (EM),  
98 average body weight (BW) and residual feed intake (RFI) at 32-44 (T1) and 57-60  
99 (T2) weeks of age are listed in **Table 1**. The RFI value of the better feed efficiency  
100 (BFE) group was found to be significantly lower ( $P<0.01$ ) than that of the poor feed  
101 efficiency (PFE) group. The FIs of the BFE group were 17.0 and 24.3 percent lower  
102 than those of the PFE group in T1 and T2, respectively. No significant difference was  
103 found in the EM and BW between the two groups.

104 The 16S rRNA gene-based sequencing produced millions of raw reads. After  
105 assembly and filtration, the BFE samples had an average of 44,998, 102,993 and  
106 66,094 clean tags in the duodenum, cecum and feces, respectively. In addition, the  
107 clean tags for the PFE samples in the duodenum, cecum and feces were 37,404,  
108 91,143 and 65,315, respectively. The average length of the clean tags was 253 bp, and  
109 the tags were taxonomically classified from kingdom to species.

110 **Predominant microbes.** The predominant microbes in the duodenum, cecum and  
111 feces were similar at the phylum level, in which *Firmicutes* and *Bacteroidetes* were  
112 the major microbes. However, the relative abundances of these two phyla were  
113 quantitatively different among the three sites (**Table 2**). *Firmicutes* accounted for  
114 more than 50% of the duodenal and fecal community, while only approximately 26%  
115 was observed in the cecal community. In contrast, greater than 50% *Bacteroidetes* was  
116 observed in the cecal microbial community, while less than 20% was found in both  
117 duodenum and feces. In the BFE group, the *Firmicutes* in the duodenum and

118 *Verrucomicrobia* in the cecum were more abundant ( $P<0.01$ ), while the *Fusobacteria*  
119 in duodenum was less abundant ( $P<0.01$ ) than in the PFE group (**Table 2**).

120 At the genus level, the top five abundant genera are shown in **Figure 1**.  
121 *Lactobacillus* (54.8% in BFE, 37.1% in PFE), followed by *Bacteroides* (2.4% in BFE,  
122 4.7% in PFE), was predominant in the duodenum. The cecum was dominated by  
123 *Bacteroides* (21.7% in BFE, 23.6% in PFE), followed by *Prevotella* (6.2% in BFE,  
124 3.9% in PFE). In addition, the feces were dominated by *Lactobacillus* (14.9% in BFE,  
125 17.8% in PFE), followed by *Clostridium* (4.9% in BFE, 7.0% in PFE). The results  
126 suggested that the dominant microbes in the duodenum and feces had greater  
127 similarity than those in the cecum.

128 **Microbial diversity.** The Shannon index was used to evaluate the microbial  
129 community diversity. The cecal microbial community had higher diversity ( $P<0.01$ )  
130 than the other two sites (**Figure 2a**). Compared with the PFE group, the BFE group  
131 had significantly lower microbial diversity ( $P<0.05$ ) in the duodenum (**Figure 2b**).  
132 Moreover, the Shannon index was correlated with the relative abundances of some  
133 microorganisms (**Figure 3**). However, the correlation trends were quite different  
134 between the duodenum and the cecum. The Shannon index was negatively correlated  
135 with the relative abundance of *Firmicutes* ( $R^2=0.58$ ), positively correlated with  
136 *Bacteroidetes* ( $R^2=0.59$ ) and negatively correlated with the ratio of *Firmicutes* to  
137 *Bacteroidetes* ( $R^2=0.40$ ). In contrast, the cecal Shannon index was positively  
138 correlated *Firmicutes* ( $R^2=0.64$ ), negatively correlated with *Bacteroidetes* ( $R^2=0.49$ )  
139 and positively correlated with the ratio of *Firmicutes* to *Bacteroidetes* ( $R^2=0.63$ ).

140 However, these relationships in the feces were weak. At the genus level, a strong  
141 negative correlation between the Shannon index and the duodenal *Lactobacillus* was  
142 observed. However, the *Lactobacillus* in the cecum and feces was weakly correlated  
143 with corresponding Shannon index.

#### 144 **Similarities of the microbial communities among the duodenum, cecum and feces.**

145 Principal coordinate analysis (PCoA) and analysis of similarities (ANOSIM) were  
146 performed to compare the microbial similarities among the duodenum, cecum and  
147 feces. The visual plot created from the unweighted PCoA (**Figure 4**) shows the  
148 relationships among the three sites. In addition, the ANOSIM numerically  
149 demonstrated that the duodenal microbial community was quite different from the  
150 cecal community (R=0.96) but closer to the fecal community (R=0.48). In addition,  
151 the observed difference between the BFE and PFE groups was greater (R=0.35) in the  
152 cecum than in the duodenum (R=0.18) and feces (R=0.03) (**Table 3**).

#### 153 **Abundance differences in the microbiota between the BFE and PFE groups.** To

154 investigate the differences in microbial abundance between the contrasting feed  
155 efficiency groups, Mann-Whitney tests between the two groups were performed, and  
156 the negative logarithms of the false discovery rate (FDR) values are shown in **Figure**  
157 **5**. It is clear that all significantly different (FDR<0.05) taxa were present in cecum.

158 The significantly different taxa in the cecum (FDR<0.05) and suggestively different  
159 taxa in the feces (FDR<0.1) are listed in **Supplementary Table**. Of these taxa, 12  
160 genera were more abundant in the BFE group than in the PFE group, while 7 genera  
161 were more abundantly in the PFE group (**Figure 6**). Notably, there were significantly

162 higher proportions of *Lactobacillus* and *Akkermansia* (FDR<0.05) in the BFE group.  
163 The comparison also revealed the difference at the species level. The relative  
164 abundance of 5 species, *Bacteroides coprophilus*, *Lactobacillus delbrueckii*,  
165 *Veillonella dispar*, *Lactobacillus reuteri* and *Prochlorococcus marinus*, were  
166 significantly higher in the BFE group (FDR<0.05), whereas 3 species,  
167 *Faecalibacterium prausnitzii*, *Parabacteroides distasonis* and *Thermobispora bispora*,  
168 were found to be significantly higher in the PFE group (FDR<0.05).

169 **Prediction of gut microflora functions.** Phylogenetic investigation of communities  
170 by reconstruction of unobserved states (PICRUSt) analysis was performed to predict  
171 microbial functions using the Kyoto Encyclopedia of Genes and Genomes (KEGG)  
172 and Clusters of Orthologous Groups of proteins (COGs) databases. The top 50  
173 predicted functions were used as variants to hierarchically cluster the samples at the  
174 three sites (**Figure 7**); this clustering showed the distinct functions of the metagenome  
175 in the duodenum, cecum and feces. Specifically, the functions associated with  
176 metabolism were mostly found in the cecum, followed by the duodenum. Additionally,  
177 the functions relating to genetic information processing were more frequent in the  
178 duodenum, while more unclassified functions were found in the feces. We also used  
179 the functions with statistically significant difference among the three sites to draw a  
180 hierarchical cluster plot (**Figure 8**). This plot showed that most of the different  
181 functions were associated with the metabolism of nutrients, such as biotin, vitamin B6,  
182 pyruvate, butanoate and propanoate. Additionally, the functional profiles in duodenum  
183 and cecum exhibited opposite features while the profile in the feces was ambiguous.

184 In the duodenum, the most significantly different functions (FDR<0.05) between  
185 the contrasting feed efficiency groups were associated with protein and amino acid  
186 metabolism (**Figure 9a, 9c**). Notably, a potential harmful function relating to  
187 epithelial cell signaling in *Helicobacter pylori* infection was enriched in the  
188 duodenum of the PFE group. In the cecum, the most significantly different functions,  
189 such as the functions related to photosynthesis, glycometabolism, ion transportation  
190 and amino acid metabolism, were enriched in the BFE group compared with the PFE  
191 group (**Figure 9b, 9d**). In feces, no function was significantly different between the  
192 two groups.

## 193 **Discussion**

194 Alterations in intestinal microbiota have been reported to have roles in affecting host  
195 metabolism<sup>27, 28</sup> and immune functions<sup>29, 30</sup>. The finding that all differentially abundant  
196 (FDR<0.05) microbes were observed in the cecum in the current study might have  
197 revealed a prominent role for cecal microbiota in feed efficiency. The microbial  
198 differences in the cecum **might be:** 1) the consequence of the physiological differences  
199 of the differential efficiency; 2) one of the factors influencing feed efficiency; or 3) the  
200 consequence of interactions with the host, which leads to the different feed efficiencies.  
201 The third possibility is likely the most acceptable one. At first, host genes shape the  
202 physiological environments as the “substrates” for microbes and the variations of  
203 “substrates” influence the gut microbial composition; then the **metabolisms** of gut  
204 microbiome affect the “substrates” in turn as feedback; finally, the interactions shape  
205 the host phenotype together<sup>31, 32</sup>.

206 The cecum has been easily overlooked because of its location at the posterior  
207 segment of the intestine. With the increasing understanding from systems biology and  
208 high-throughput sequencing technology, the cecum and its microbiota are receiving  
209 growing attention in terms of disease<sup>33, 34</sup> and metabolism<sup>35, 36</sup>. This study determined  
210 the microbial community composition and the predicted functions of the metagenome  
211 in the cecum, duodenum and feces and has thus provided comparative information for  
212 understanding the cecal microbiota.

213 However, the relative abundance of some differentially abundant microbes between  
214 **the BFE and** PFE groups was not consistent in the duodenum, cecum and feces. For

215 example, the relative abundance of *Helicobacter* was found to be suggestively higher  
216 in the cecum of the PFE group (FDR=0.073) but suggestively higher in the feces of the  
217 BFE group (FDR=0.062). Therefore, caution should be taken when employing changes  
218 in the microbial community in feces as biomarkers to infer the state of the intestinal  
219 microbiota.

220 *Lactobacillus* was highly related with the host feed efficiency. *Lactobacillus* was one  
221 of the differentially abundant taxa and accounted for a greater proportion than did the  
222 other differentially abundant taxa. This genus, which is a beneficial commensal for  
223 humans and animals, has been studied and used in medicine and the food industry for  
224 years. Compared with the PFE group, the BFE group showed increases in duodenal  
225 *Lactobacillus* ( $P=0.002$ , FDR=0.162) and cecal *Lactobacillus delbrueckii* and  
226 *Lactobacillus reuteri* (FDR<0.05) in the current study. Previous studies suggested that  
227 some species of *Lactobacillus* are associated with weight gain in human and animal  
228 infants<sup>37-39</sup>. Nevertheless, the body weight of the BFE group was not significantly  
229 higher than that of the PFE group, which was not consistent with the statement by  
230 Million<sup>40</sup> that *Lactobacillus* would lead to obesity or weight gain. The results we  
231 obtained were in agreement with Lahtinen<sup>41</sup>, who suggested that some species of  
232 *Lactobacillus* would be associated with weight gain in infancy but not in human and  
233 animal adults. Although the effects of the enriched *Lactobacillus* might be different in  
234 infancy and adulthood, it could be inferred that the enriched *Lactobacillus* could  
235 generally improve the gastrointestinal tract and thus protect the gut from pathogens and  
236 promote efficient nutrient and energy extraction in the host.

237 Nevertheless, the increase in *Lactobacillus* would reduce the diversity of the  
238 microbial community in the corresponding gut segments, as shown in this study.  
239 Biodiversity is useful and important in indicating the health, disease and stability of  
240 ecosystems. An increase in microbial diversity in gut has been linked to improved  
241 health in the elderly<sup>42</sup>, while a loss of diversity has been associated with worsening of  
242 inflammatory bowel diseases (IBDs) and adiposity-related inflammation<sup>43, 44</sup>. In  
243 another study, the gut microbial diversities of athletes were found to be significantly  
244 higher than those of the control groups<sup>45</sup>. Hence, even with a better feed efficiency, the  
245 decrease in diversity in the duodenal microbiota community in the BFE group might be  
246 a signal for some latent dangers due to a community imbalance. However, consistent  
247 results have not been observed in feces, suggesting that the diversity in feces should be  
248 cautiously used to represent the diversity of intestinal segments.

249 *Akkermansia spp.*, a widely studied microorganism that is inversely associated with  
250 obesity<sup>46, 47</sup>, was found to be more abundant in the cecum of the BFE group.  
251 *Akkermansia* has been reported to be a mucin degradation-specialized bacterium that  
252 utilizes mucus as a sole carbon and nitrogen source<sup>48</sup>. An increase in *Akkermansia* has  
253 been shown to protect the niche from IBDs<sup>49</sup>, obesity<sup>46, 50</sup>, and type I and type II  
254 diabetes mellitus<sup>51, 52</sup>.

255 Interestingly, a potentially beneficial microbe, *Faecalibacterium prausnitzii*, was  
256 more abundant in the PFE group. This species has been found to be strongly reduced in  
257 the intestinal mucosa and fecal samples of patients with Crohn's disease<sup>53, 54</sup>. Because  
258 of the anti-inflammatory abilities of *F. prausnitzii*, the flourishing of this species in the

259 PFE group might improve the ability of the host to protect against pathogens while  
260 consume more nutrients and energy as cost.

261 In the cecum, *Lactobacillus* accounted for approximately 4% of all microbes, but the  
262 relative abundances of other differentially abundant microbes accounted for not more  
263 than 1%. Although the relative abundances of these microbes were low in the microbial  
264 communities, they might “work” together to form a core measurable microbiota group  
265 that interacts with the host<sup>55</sup>; this possibility is similar to the polygene hypothesis in  
266 which proposes that many minor genes and several major genes (sometimes) are  
267 involved in the control of a quantitative trait. Hence, in this study, the *Lactobacillus* in  
268 the duodenum and cecum might play a “major gene” role, and other differentially  
269 abundant microbes in cecum perform the “minor gene” role in influencing host feed  
270 efficiency.

271 In conclusion, with the high-throughput sequencing technology, this study profiled  
272 the microbial communities in the duodenum, cecum and feces, which represent the  
273 niches of the anterior segment, posterior segment and the end of gastrointestinal tract,  
274 respectively. We found that the cecal microbiota was highly related to the feed  
275 efficiency, suggesting a prominent role for the cecal microbiota in chicken feed  
276 efficiency. The differentially abundant microbes, particularly *Lactobacillus*, might play  
277 a major role in affecting the feed efficiency. In addition, the differences among the  
278 three sites suggested that the fecal samples could be measured as references for the  
279 intestinal segments but could not reflect the actual status of the microbiota in the  
280 gastrointestinal tract. Therefore, the results provided a promising strategy to improve

281 feed efficiency by cecal-oriented and differential microbiota-oriented alterations, and  
282 indicated that some segments (e.g., the cecum, which has not been well considered to  
283 date), should receive more attention for strategies to improve the health and nutrition  
284 of the host.

285 **Methods**

286 **Animals and phenotypic data collection.** The complete procedure was performed  
287 according to the regulations and guidelines established by the Animal Care and Use  
288 Committee of China Agricultural University. The entire study was approved by the  
289 committee (permit number: SYXK 2007-0023).

290 A line of brown-egg dwarf **layer** (DW), which has been maintained and selected  
291 mainly for egg production for more than 10 years in the Poultry Genetic Resource and  
292 Breeding Experimental Unit of China Agricultural University<sup>56</sup>, was used in this study.  
293 Two hundred and fifty two hens were randomly selected from a large population of this  
294 line and housed in individual cages in the same barn with **ad libitum** access to a layer  
295 diet. The cages **allowed automatic recording** for the egg production and feed intake  
296 every day from the 32<sup>th</sup> to the 44<sup>th</sup> week and from the 57<sup>th</sup> to **the 60<sup>th</sup>** week of age. The  
297 body weight was measured every 4 weeks<sup>57</sup>. The theoretical FI value was calculated  
298 using a lm procedure in an R project following the model<sup>57</sup> of  $FI(\text{expected}) = b_0 +$   
299  $b_1MBW^{0.75} + b_2EMDc + b_3BWG$ , in which “FI(expected)”, “MBW”, “MBW<sup>0.75</sup>”,  
300 “EMDc” and “BWG” represent the expected feed intake, mean body weight, metabolic  
301 body weight, corrected egg mass production(adjusted abnormal egg) and body weight  
302 gain, respectively. RFI was then calculated from the actual FI by subtracting the  
303 expected FI. The RFI value, which was used to assess the feed efficiency, was  
304 negatively correlated with the feed efficiency.

305 **Sample collection, DNA extraction and sequencing of the 16S rRNA genes.** Hens  
306 were ranked by RFI, after which the 14 hens with the lowest RFI and the 14 hens with

307 the highest RFI were selected for sampling by the 60<sup>th</sup> week of age. Fresh feces were  
308 collected from the 28 hens, after which the hens were humanly euthanized for  
309 collecting the duodenal and cecal contents. All samples were immediately placed in  
310 liquid nitrogen and stored at -80°C.

311 Microbial genome DNA was extracted from the duodenal, cecal and fecal samples  
312 using a QIAamp DNA stool mini kit (QIAGEN, cat#51504)<sup>58</sup> following the  
313 manufacturer's instructions. The V4 hypervariable region of the 16S rRNA genes was  
314 PCR amplified from the microbial genomic DNA using primers 515F – 806R (515F:  
315 GTGCCAGCMGCCGCGGTAA, 806R: GGACTACHVGGGTWTCTAAT). All PCR  
316 reactions were performed in 30 µL reactions with 15 µL of Phusion® High-Fidelity  
317 PCR Master Mix (New England Biolabs), 0.2 µM forward and reverse primers and  
318 approximately 10 ng of template DNA. Thermal cycling consisted of initial  
319 denaturation at 98 °C for 1 min, followed by 30 cycles of denaturation at 98 °C for  
320 10 s, annealing at 50 °C for 30 s, and elongation at 72 °C for 30 s, followed by 72°C  
321 for 5 min. Sequencing libraries were generated using the NEB Next® Ultra™ DNA  
322 library Prep Kit for Illumina (NEB, USA) following the manufacturer's  
323 recommendations, and index codes were added. The library quality was assessed on a  
324 Qubit® 2.0 Fluorometer (Thermo Scientific) and Agilent Bioanalyzer 2100 system  
325 (Agilent Technologies, Inc.). Finally, the library was sequenced on an Illumina Miseq  
326 platform and 2 bp/300 bp paired-end reads were generated.

327 **Data analysis.** Paired-end reads from the original DNA fragments were merged using  
328 FLASH<sup>59</sup> and were assigned to each sample. Sequences were analyzed using the

329 QIIME<sup>60</sup> software package, and those with  $\geq 97\%$  similarity were assigned to the same  
330 operational taxonomic units (OTUs). We pick a representative sequences for each OUT  
331 and use the Ribosomal Database Project (RDP) classifier to obtain taxonomic  
332 information for each representative sequence. Prediction of the microbial function was  
333 performed with PICRUST<sup>61</sup>.

334 The data for the relative abundance of OTUs and predicted function were analyzed  
335 for statistical significance with the Mann-Whitney U test in R. *P*-values were adjusted  
336 by FDR using the BH method with the `mt.rawp2adjp` function in R  
337 (<http://faculty.mssm.edu/gey01/-multtest/multtest-manual.pdf>). ANOSIM analysis<sup>62</sup>  
338 was performed in R with the package “vegan”. Principal coordinate analysis (PCoA)  
339 was conducted using QIIME.

340

## 341 **References**

- 342 1. Kohl, K.D. Diversity and function of the avian gut microbiota. *J. Comp. Physiol. B.* **182**, 591-602  
343 (2012).
- 344 2. DeGolier, T.F., Mahoney, S.A. & Duke, G.E. Relationships of avian cecal lengths to food habits,  
345 taxonomic position, and intestinal lengths. *Condor* **101**, 622-634 (1999).
- 346 3. Clench, M.H. & Mathias, J.R. The avian cecum: a review. *Wilson Bull.* **107**, 93-121 (1995).
- 347 4. Chaplin, S.B. Effect of cecectomy on water and nutrient absorption of birds. *J. Exp. Zool. Suppl.* **3**,  
348 81-86 (1989).
- 349 5. Savory, C.J. & Mitchell, M.A. Absorption of hexose and pentose sugars in vivo in perfused  
350 intestinal segments in the fowl. *Comp. Biochem. Physiol. A. Physiol.* **100**, 969-974 (1991).
- 351 6. Vinardell, M.P. & Lopera, M.T. Jejunal and cecal 3-oxy-methyl-d-glucose absorption in chicken  
352 using a perfusion system in vivo. *Comp. Biochem. Physiol. A. Physiol.* **86**, 625-627 (1987).
- 353 7. Riesenfeld, G., Geva, A. & Hurwitz, S. Glucose homeostasis in the chicken. *J. Nutr.* **112**,  
354 2261-2266 (1982).
- 355 8. Heard, G.S. & Annison, E.F. Gastrointestinal absorption of vitamin B-6 in the chicken (*Gallus*  
356 *domesticus*). *J. Nutr.* **116**, 107-120 (1986).
- 357 9. Muir, A. & Hopper, U. Regional specificity of iron uptake by small intestinal brush-border  
358 membranes from normal and iron-deficient mice. *Am. J. Physiol.* **248**, 376-379 (1985).
- 359 10. Mead, G.C. Microbes of the avian cecum: types present and substrates utilized. *J. Exp. Zool.* **252**,  
360 48-54 (1989).
- 361 11. Vispo, C. & Karasov, W.H. The interaction of avian gut microbes and their host: An elusive  
362 symbiosis in *Gastrointestinal Microbiology* (ed. Mackie, R.I. *et al.*) 116-155 (Springer, 1997).

- 363 12. Sergeant, M.J. et al. Extensive microbial and functional diversity within the chicken cecal  
364 microbiome. *PLoS One* **9**, e91941 (2014).
- 365 13. McWhorter, T.J., Caviedes Vidal, E. & Karasov, W.H. The integration of digestion and  
366 osmoregulation in the avian gut. *Biol. Rev.* **84**, 533-565 (2009).
- 367 14. Apajalahti, J. Comparative gut microflora, metabolic challenges, and potential opportunities. *J.*  
368 *Appl. Poultry Res.* **14**, 444-453 (2005).
- 369 15. Gong, J. et al. 16S rRNA gene-based analysis of mucosa-associated bacterial community and  
370 phylogeny in the chicken gastrointestinal tracts: from crops to ceca. *FEMS Microbiol. Ecol.* **59**,  
371 147-157 (2007).
- 372 16. Gu, S. et al. Bacterial community mapping of the mouse gastrointestinal tract. *PLoS One* **8**,  
373 e74957 (2013).
- 374 17. Stanley, D., Geier, M.S., Chen, H., Hughes, R.J. & Moore, R.J. Comparison of fecal and cecal  
375 microbiotas reveals qualitative similarities but quantitative differences. *BMC Microbiol.* **15**, 1-11  
376 (2015).
- 377 18. Chambers, J.R. & Lin, C.Y. Age-constant versus weight-constant feed consumption and  
378 efficiency in broiler chickens. *Poultry Sci.* **67**, 565-576 (1988).
- 379 19. Atchley, W.R., Gaskins, C.T. & Anderson, D. Statistical properties of ratios. I. Empirical results.  
380 *Syst. Biol.* **25**, 137-148 (1976).
- 381 20. Koch, R.M., Swiger, L.A., Chambers, D. & Gregory, K.E. Efficiency of feed use in beef cattle. *J.*  
382 *Anim. Sci.* **22**, 486-494 (1963).
- 383 21. Luiting, P. Genetic variation of energy partitioning in laying hens: causes of variation in residual  
384 feed consumption. *World. Poultry Sci. J.* **46**, 133-152 (1990).

- 385 22. Pakdel, A., Arendonk, J.V., Vereijken, A. & Bovenhuis, H. Genetic parameters of ascites-related  
386 traits in broilers: correlations with feed efficiency and carcass traits. *Brit. Poultry Sci.* **46**, 43-53  
387 (2005).
- 388 23. Yuan, J. et al. Genetic parameters of feed efficiency traits in laying period of chickens. *Poultry*  
389 *Sci.* **94**, 1470-1475 (2015).
- 390 24. Aggrey, S.E., Karnuah, A.B., Sebastian, B. & Anthony, N.B. Genetic properties of feed efficiency  
391 parameters in meat-type chickens. *Genet. Sel. Evol.* **42**, 1-5 (2010).
- 392 25. Singh, K.M. et al. High throughput 16S rRNA gene-based pyrosequencing analysis of the fecal  
393 microbiota of high FCR and low FCR broiler growers. *Mol. Biol. Rep.* **39**, 10595-10602 (2012).
- 394 26. Mignon-Grasteau, S. et al. Impact of selection for digestive efficiency on microbiota composition  
395 in the chicken. *PloS One* **10**, e135488 (2015).
- 396 27. Turnbaugh, P.J., Backhed, F., Fulton, L. & Gordon, J.I. Diet-induced obesity is linked to marked  
397 but reversible alterations in the mouse distal gut microbiome. *Cell Host Microbe* **3**, 213-223  
398 (2008).
- 399 28. Stanley, D. et al. Identification of chicken intestinal microbiota correlated with the efficiency of  
400 energy extraction from feed. *Vet. Microbiol.* **164**, 85-92 (2013).
- 401 29. Peterson, D.A., McNulty, N.P., Guruge, J.L. & Gordon, J.I. IgA response to symbiotic bacteria as  
402 a mediator of gut homeostasis. *Cell Host Microbe* **2**, 328-339 (2007).
- 403 30. Derrien, M. et al. Modulation of mucosal immune response, tolerance, and proliferation in mice  
404 colonized by the mucin-degrader *Akkermansia muciniphila*. *Front. Microbiol.* **2**, 166 (2010).
- 405 31. Goodrich, J. et al. Human genetics shape the gut microbiome. *Cell* **159**, 789-799 (2014).
- 406 32. Goodrich, J.K., Davenport, E.R., Waters, J.L., Clark, A.G. & Ley, R.E. Cross-species

- 407 comparisons of host genetic associations with the microbiome. *Science* **352**, 532-535 (2016).
- 408 33. Moreau, M.M., Eades, S.C., Reinemeyer, C.R., Fugaro, M.N. & Onishi, J.C. Illumina sequencing  
409 of the V4 hypervariable region 16S rRNA gene reveals extensive changes in bacterial  
410 communities in the cecum following carbohydrate oral infusion and development of early-stage  
411 acute laminitis in the horse. *Vet. Microbiol.* **168**, 436-441 (2014).
- 412 34. Wohlgemuth, S. et al. Intestinal steroid profiles and microbiota composition in colitic mice. *Gut*  
413 *Microbes* **2**, 159-166 (2011).
- 414 35. Wang, W. et al. Porcine gut microbial metagenomic library for mining novel cellulases  
415 established from grower pigs fed cellulose-supplemented high-fat diets. *J. Anim. Sci.* **90 Suppl 4**,  
416 400-402 (2012).
- 417 36. Stanley, D. et al. Intestinal microbiota associated with differential feed conversion efficiency in  
418 chickens. *Appl. Microbiol. Biot.* **96**, 1361-1369 (2012).
- 419 37. Robinson, E.L. & Thompson, W.L. Effect of weight gain of the addition of *Lactobacillus*  
420 *acidophilus* to the formula of newborn infants. *J. Pediatr.* **41**, 395-398 (1952).
- 421 38. Angelakis, E. & Raoult, D. The increase of *Lactobacillus* species in the gut flora of newborn  
422 broiler chicks and ducks is associated with weight gain. *PLoS One* **5**, e10463 (2010).
- 423 39. Million, M. et al. Obesity-associated gut microbiota is enriched in *Lactobacillus reuteri* and  
424 depleted in *Bifidobacterium animalis* and *Methanobrevibacter smithii*. *Int. J. Obes. (London)* **36**,  
425 817-825 (2012).
- 426 40. Million, M. et al. Comparative meta-analysis of the effect of *Lactobacillus* species on weight gain  
427 in humans and animals. *Microb. Pathog.* **53**, 100-108 (2012).
- 428 41. Lahtinen, S.J., Davis, E. & Ouwehand, A.C. *Lactobacillus* species causing obesity in humans:

- 429 where is the evidence? *Benef. Microbes* **3**, 171-174 (2012).
- 430 42. Claesson, M.J. et al. Gut microbiota composition correlates with diet and health in the elderly.  
431 *Nature* **488**, 178-184 (2012).
- 432 43. Ott, S.J. et al. Reduction in diversity of the colonic mucosa associated bacterial microflora in  
433 patients with active inflammatory bowel disease. *Gut* **53**, 685-693 (2004).
- 434 44. Manichanh, C. et al. Reduced diversity of faecal microbiota in Crohn's disease revealed by a  
435 metagenomic approach. *Gut* **55**, 205-211 (2006).
- 436 45. Clarke, S.F. et al. Exercise and associated dietary extremes impact on gut microbial diversity. *Gut*  
437 **63**, 1913-1920 (2014).
- 438 46. Santacruz, A. et al. Gut microbiota composition is associated with body weight, weight gain and  
439 biochemical parameters in pregnant women. *Brit. J. Nutr.* **104**, 83-92 (2010).
- 440 47. Karlsson, C.L. et al. The microbiota of the gut in preschool children with normal and excessive  
441 body weight. *Obesity* **20**, 2257-2261 (2012).
- 442 48. Derrien, M., Vaughan, E.E., Plugge, C.M. & de Vos, W.M. *Akkermansia muciniphila* gen. nov.,  
443 sp. nov., a human intestinal mucin-degrading bacterium. *Int. J. Syst. Evol. Micr.* **54**, 1469-1476  
444 (2004).
- 445 49. Png, C.W. et al. Mucolytic bacteria with increased prevalence in IBD mucosa augment in vitro  
446 utilization of mucin by other bacteria. *Am. J. Gastroenterol.* **105**, 2420-2428 (2010).
- 447 50. Zhang, H. et al. Human gut microbiota in obesity and after gastric bypass. *Proc. Natl. Acad. Sci.*  
448 *U. S. A.* **106**, 2365-2370 (2009).
- 449 51. Hansen, C.H.F. et al. Early life treatment with vancomycin propagates *Akkermansia muciniphila*  
450 and reduces diabetes incidence in the NOD mouse. *Diabetologia* **55**, 2285-2294 (2012).

- 451 52. Qin, J. et al. A metagenome-wide association study of gut microbiota in type 2 diabetes. *Nature*  
452 **490**, 55-60 (2012).
- 453 53. Sokol, H., Pigneur, B. & Watterlot, L. Faecalibacterium prausnitzii is an anti-inflammatory  
454 commensal bacterium identified by gut microbiota analysis of Crohn disease patients. *Proc. Natl.*  
455 *Acad. Sci. U. S. A.* **105**, 16731-16736 (2008).
- 456 54. Willing, B.P. et al. A pyrosequencing study in twins shows that gastrointestinal microbial profiles  
457 vary with inflammatory bowel disease phenotypes. *Gastroenterology* **139**, 1844-1854 (2010).
- 458 55. Benson, A.K. & Mackay, T.F.C. Individuality in gut microbiota composition is a complex  
459 polygenic trait shaped by multiple environmental and host genetic factors. *Proc. Natl. Acad. Sci.*  
460 *U. S. A.* **107**, 18933-18938 (2010).
- 461 56. Zhang, L., Ning, Z., Xu, G., Hou, Z. & Yang, N. Heritabilities and genetic and phenotypic  
462 correlations of egg quality traits in brown-egg dwarf layers. *Poultry Sci.* **84**, 1209-1213 (2005).
- 463 57. Luiting, P. & Urff, E.M. Optimization of a model to estimate residual feed consumption in the  
464 laying hen. *Livest. Prod. Sci.* **27**, 321-338 (1991).
- 465 58. Zhao, L.L. et al. Quantitative genetic background of the host influences gut microbiomes in  
466 chickens. *Sci. Rep.* **3**, 1970 (2013).
- 467 59. Magoč, T. & Salzberg, S.L. FLASH: fast length adjustment of short reads to improve genome  
468 assemblies. *Bioinformatics* **27**, 2957-2963 (2011).
- 469 60. Caporaso, J.G. et al. QIIME allows analysis of high-throughput community sequencing data. *Nat.*  
470 *Methods* **7**, 335-336 (2010).
- 471 61. Langille, M.G. et al. Predictive functional profiling of microbial communities using 16S rRNA  
472 marker gene sequences. *Nat. Biotechnol.* **31**, 814-821 (2013).

473 62. Clarke, K.R. & Ainsworth, M. A method of linking multivariate community. *Mar. Ecol. Prog. Ser.*  
474 **92**, 205-219 (1993).  
475  
476

477 **Acknowledgments**

478 We are grateful for animal breeding support from the team of the National  
479 Engineering Laboratory. The current study was funded in part by Programs for  
480 Changjiang Scholars and Innovative Research in University (IRT1191) and China  
481 Agriculture Research Systems (CARS-41).

482

483 **Author contributions statement**

484 NY conceived the study and designed the project. JWY and WY collected samples  
485 and measured phenotypic data. WY performed bioinformatic analyses and interpreted  
486 the data. WY and CJS wrote the paper. All authors read and approved the final  
487 manuscript.

488

489 **Additional information**

490 **Competing financial interests:** The authors declare no competing interests.

491 **Figure legends**

492 **Figure 1. Predominant microbes in a) duodenum, b) cecum and c) feces at the**  
493 **genus level.** The outer and inner rings indicate the better feed efficiency and poor  
494 feed efficiency groups, respectively.

495 **Figure 2. Shannon index in duodenum, cecum and feces and the contrasting feed**  
496 **efficiency groups.** BFE and PFE denote better feed efficiency and poor feed  
497 efficiency, respectively. <sup>a, b</sup> different superscripted small letters indicate significant  
498 difference at  $P < 0.05$ . <sup>A, B</sup> different superscripted capital letters indicate significant  
499 differences at  $P < 0.01$ .

500 **Figure 3. Regression curves.** The vertical axes represent the Shannon index of the  
501 corresponding gut segments, and the horizontal axes represent the relative abundance  
502 of the corresponding microbes: a1-a3: *Firmicutes*, b1-b3: *Bacteroidetes*, c1-c3: the  
503 ratio of *Firmicutes* to *Bacteroidetes* and d1-d3: *Lactobacillus*.

504 **Figure 4. Principal coordinate analysis plot.** BFE and PFE denote better feed  
505 efficiency and poor feed efficiency, respectively. “D\_”, “C\_” and “F\_” represent the  
506 duodenum, cecum and feces, respectively.

507 **Figure 5. Negative logarithm scatter plot of the adjusted  $P$  values.** The plot  
508 indicates  $-\ln$  (adjusted  $P$ -values) (y-axis) plotted against all taxonomic microbes  
509 (x-axis) and the horizontal dotted lines depict the significant thresholds. The adjusted  
510  $P$ -values have been corrected by FDR.

511 **Figure 6. Box plots of differentially abundant genera and species in cecum**  
512 **(FDR<0.0.5) and feces (FDR<0.1).** BFE and PFE denote better feed efficiency and  
513 poor feed efficiency, respectively.

514 **Figure 7. Heat map of the top 50 predicted functions by KEGG.** CB, DB and FB  
515 denote the better feed efficiency groups in cecum, duodenum and feces, respectively.  
516 CP, DP and FP denote the poor feed efficiency groups in cecum, duodenum and feces,  
517 respectively.

518 **Figure 8. Heat map showing the different abundances of functions predicted by**  
519 **KEGG among duodenum, cecum and feces.** CB, DB and FB denote better feed  
520 efficiency groups in cecum, duodenum and feces, respectively. CP, DP and FP denote  
521 poor feed efficiency groups in cecum, duodenum and feces, respectively.

522 **Figure 9. Differences in the abundance of KEGG and COG functions between**  
523 **the better feed efficiency and poor feed efficiency groups.** BFE and PFE denote  
524 better feed efficiency and poor feed efficiency, respectively.

525

526 **Tables**

527

|                               | 32-44 wks                |                         | 57-60 wks                |                          |
|-------------------------------|--------------------------|-------------------------|--------------------------|--------------------------|
|                               | BFE                      | PFE                     | BFE                      | PFE                      |
| Average daily feed intake (g) | 80.8±12.3 <sup>A</sup>   | 97.4±4.1 <sup>B</sup>   | 84.7±16.4 <sup>A</sup>   | 111.9±17.4 <sup>B</sup>  |
| Average daily egg mass (g)    | 36.0±8.7                 | 40.0±3.7                | 40.3±6.6                 | 32.9±12.5                |
| Average body weight (g)       | 1258.0±150.2             | 1313.6±90.7             | 1393.4±97.3              | 1402.3±108.3             |
| RFI value                     | -5.66 ±2.26 <sup>A</sup> | 6.18 ±2.15 <sup>B</sup> | -10.06±2.64 <sup>A</sup> | 14.69 ±4.34 <sup>B</sup> |

528 **Table 1. Summary of phenotypes in the two laying periods.** Different superscripted  
 529 capital letters in the same period indicate a significant difference at  $P<0.01$ . BFE and PFE denote  
 530 better feed efficiency and poor feed efficiency, respectively.

| Duodenum (%) |                 |                    |                    | Cecum (%) |                 |                   |                   | Feces (%) |                 |       |       |
|--------------|-----------------|--------------------|--------------------|-----------|-----------------|-------------------|-------------------|-----------|-----------------|-------|-------|
| Kingdom      | Phylum          | BFE <sup>1</sup>   | PFE                | Kingdom   | Phylum          | BFE               | PFE               | Kingdom   | Phylum          | BFE   | PFE   |
| Bacteria     | Firmicutes      | 76.52 <sup>A</sup> | 65.18 <sup>B</sup> | Bacteria  | Bacteroidetes   | 54.86             | 56.28             | Bacteria  | Firmicutes      | 54.57 | 61.41 |
| Bacteria     | Bacteroidetes   | 7.10               | 12.73              | Bacteria  | Firmicutes      | 27.74             | 26.93             | Bacteria  | Bacteroidetes   | 15.84 | 13.77 |
| Bacteria     | Proteobacteria  | 7.41               | 8.35               | Bacteria  | Proteobacteria  | 6.02              | 7.16              | Bacteria  | Fusobacteria    | 8.93  | 14.19 |
| Bacteria     | Fusobacteria    | 0.93 <sup>A</sup>  | 6.39 <sup>B</sup>  | Bacteria  | Fusobacteria    | 2.91              | 1.62              | Bacteria  | Proteobacteria  | 15.25 | 6.55  |
| Bacteria     | Cyanobacteria   | 2.01               | 2.60               | Bacteria  | Cyanobacteria   | 0.53              | 0.50              | Bacteria  | Cyanobacteria   | 0.48  | 0.55  |
| Archaea      | Euryarchaeota   | 2.13               | 1.10               | Bacteria  | Tenericutes     | 0.42              | 0.45              | Bacteria  | Actinobacteria  | 0.35  | 0.23  |
| Bacteria     | Acidobacteria   | 0.76               | 0.36               | Bacteria  | Verrucomicrobia | 0.52 <sup>A</sup> | 0.04 <sup>B</sup> | Bacteria  | Tenericutes     | 0.30  | 0.22  |
| Bacteria     | Actinobacteria  | 0.70               | 0.39               | Bacteria  | Deferribacteres | 0.13              | 0.20              | Bacteria  | Acidobacteria   | 0.05  | 0.08  |
| Bacteria     | Verrucomicrobia | 0.41               | 0.24               | Bacteria  | Spirochaetes    | 0.19              | 0.12              | Bacteria  | Verrucomicrobia | 0.04  | 0.08  |
| Bacteria     | Planctomycetes  | 0.33               | 0.20               | Bacteria  | Actinobacteria  | 0.14              | 0.13              | Archaea   | Euryarchaeota   | 0.07  | 0.03  |

532 **Table 2. Relative abundance of the dominant phyla in duodenum, cecum and feces of the laying hens.** Different superscripted capital letters in

533 the same segment indicate an adjusted significant difference at  $P < 0.01$ . BFE and PFE denote better feed efficiency and poor feed efficiency, respectively.

| Comparison         | R    | P-values |
|--------------------|------|----------|
| Duodenum Vs. Cecum | 0.96 | <0.01    |
| Duodenum Vs. Feces | 0.48 | <0.01    |
| Cecum Vs. Feces    | 0.78 | <0.01    |
| D_BFE Vs. D_PFE    | 0.18 | <0.01    |
| C_BFE Vs. C_PFE    | 0.35 | <0.01    |
| F_BFE Vs. F_PFE    | 0.03 | 0.28     |

534 **Table 3. ANOSIM analysis results comparing duodenum, cecum and feces and**  
535 **between the different feed efficiency groups.** “R” is the index of ANOSIM that indicates  
536 the similarity of comparison group pairs. “R” ranges from -1 to 1: the pairs are more similar when  
537 the R index is closer to 0 and the pairs are different from each other when the R index is close to 1.

538

539

#### 540 **Supplementary Information**

541 Supplementary table as **excel file**: All differentially abundant taxa in the cecum  
542 (FDR<0.05) and feces (FDR<0.1).
